# Supplementary material
Source: Royal Society of Chemistry journal article supplement (doi:10.1039/d6cc02283a)
Supplement: d6cc02283a1.pdf [file d6cc02283a1.pdf]

## Supporting Information

### **Nanozymes with Controllable Inhibition Modes Assist Primary Antithyroid Drug Screening**

*Lu Dong, Jiajun Li, Xiaolei Sun, Wei Zhang, Nana Guo, Yiming Zhang, Lijun Hu, Chengjie Chen, Lei  
Jiao\* and Yanling Zhai\**

Institute of Molecular Metrology, College of Chemistry and Chemical Engineering, Qingdao University,  
Qingdao, 266071, P. R. China

E-mail: [jiaolei@qdu.edu.cn](mailto:jiaolei@qdu.edu.cn); [zhaiyanling@qdu.edu.cn](mailto:zhaiyanling@qdu.edu.cn)

# 1. Experimental section

## Instruments

Transmission electron microscopy (TEM) and high-resolution transmission electron microscopy (HRTEM) images were taken using a FEI Talos F200X G2 transmission electron microscope. X-ray photoelectron spectroscopy (XPS) spectra were acquired on a Thermo Scientific K-Alpha electron spectrometer. Crystal structures of samples were examined by X-ray diffraction (XRD) (Rigaku Smart Lab SE). Fourier transform infrared spectroscopy (FT-IR) measurements were performed on an IRTracer-100. All nanozyme kinetics data and UV-vis spectra were obtained by a multimode reader (Tecan Spark, Switzerland).

## Materials

Chloroplatinic acid ( $\text{H}_2\text{PtCl}_6 \cdot 6\text{H}_2\text{O}$ ) glucosamine hydrochloride, D-(+)-Glucose monohydrate, horseradish peroxidase (HRP), methimazole (MMI), propylthiouracil (PTU), methyl-thiouracil (MTU), and carbimazole (CBZ) were purchased from Shanghai Aladdin Biochemical Technology Co., Ltd. Sodium acetate (NaAc), 3,3',5,5'-tetramethylbenzidine (TMB) and zinc chloride ( $\text{ZnCl}_2$ ) were obtained from Shanghai Maclin Biochemical Technology Co., Ltd. LuDOX(R)TM-40 colloidal silica was purchased from Sigma-Aldrich. Hydrogen peroxide ( $\text{H}_2\text{O}_2$ ) was purchased from Sinopharm Chemical Reagent Co., Ltd.

## Synthesis of $\text{Pt}_{\text{NP}}/\text{NC}$

A homogeneous aqueous mixture containing  $\text{ZnCl}_2$  (2 mmol), D-glucosamine hydrochloride (10 mmol), colloidal  $\text{SiO}_2$  (5 mL) and  $\text{H}_2\text{O}$  (10 mL) was stirred for 10 minutes and subsequently lyophilized. The resulting powder was annealed in  $\text{N}_2$  at 900 °C for 2 h (heating rate: 5 °C  $\text{min}^{-1}$ ). The black product was immersed in 10% HF for 24 h to remove silica, affording nitrogen-doped carbon (NC). An aqueous suspension of NC (100 mg in 100 mL  $\text{H}_2\text{O}$ ) was treated dropwise with  $\text{H}_2\text{PtCl}_6$  (200  $\mu\text{L}$ , 100 mM) under

stirring for 12 h. After centrifugation, washing and drying, the solid was reduced under Ar/H<sub>2</sub> (5%) at 900 °C to convert the adsorbed Pt ions into Pt<sub>NPs</sub>, yielding Pt<sub>NP</sub>/NC. C was prepared by the same protocol except that D-glucosamine hydrochloride was replaced with D-glucose. Pt<sub>NP</sub>/C was obtained analogously by substituting NC with the as-prepared C.

## Evaluation of the H<sub>2</sub>O<sub>2</sub> kinetics

First, as for the kinetic data towards H<sub>2</sub>O<sub>2</sub>, 10 μL of nanozymes were added into the mixture, including TMB (100 μL, 1 mM), HAc–NaAc (100 μL, 0.1 M, pH 3.0), and different concentrations of H<sub>2</sub>O<sub>2</sub> (100 μL). Kinetic data were obtained and fitted by the nonlinear regression following the Michaelis–Menten Equation 1:

$$\frac{1}{v} = \frac{K_m}{V_{max}[S]} + \frac{1}{V_{max}}$$

Where  $V$  is the initial velocity,  $[S]$  is the concentration of the substrate,  $K_m$  is the Michaelis–Menten constant, and  $V_{max}$  is the maximal reaction velocity.

## Cyclic experiment

First, as for the cyclic experiment towards HRP, 100 μL of HRP (5 μg mL<sup>-1</sup>) was added into the centrifuge tube with HAc–NaAc (1 mL, 0.1 M, pH 3.0) and was set up for high-speed centrifugation operation to remove the supernatant. Each centrifugation is considered to be a cycle, while the blank control group is also centrifuged to avoid material loss during the operation. After centrifugation, the buffer solution was added for the performance test.

## Inhibitory effects of antithyroid drugs on the POD-like activity of Pt<sub>NP</sub>/NC

The inhibitory effects of MMI on the POD-like activity of Pt<sub>NP</sub>/NC were investigated by measuring the residual activity. The initial velocities of H<sub>2</sub>O<sub>2</sub> reduction varying with Pt<sub>NP</sub>/NC concentration were gauged by changing the concentrations of Pt<sub>NP</sub>/NC from 0 to 20 μg mL<sup>-1</sup> while maintaining the H<sub>2</sub>O<sub>2</sub> concentration

at 100 mM. The same procedures were executed at MMI concentration (0.05 mM) to investigate the effect of MMI. The steady-state kinetics of Pt<sub>NP</sub>/NC concerning H<sub>2</sub>O<sub>2</sub> with MMI were studied by varying the H<sub>2</sub>O<sub>2</sub> concentration while keeping the concentrations of MMI and Pt<sub>NP</sub>/NC fixed. Lineweaver-Burk curves were used to calculate the Michaelis constant ( $K_m^I$ ) and maximum reaction velocity ( $V_m^I$ ) at different concentrations of antithyroid drugs. The Michaelis-Menten equation of the mixed-inhibition system could be expressed by Equation 2:

$$\frac{1}{\bar{V}} = \frac{K_m}{V_m} \times \frac{1}{S} (1 + [I]/K_i) + \frac{1}{V_m} (1 + [I]/K_i') \quad (2)$$

$K_m^I$ ,  $V_m^I$  and  $[I]$  could be described as  $\frac{K_m^I}{V_m^I} = \frac{K_m}{V_m} (1 + [I]/K_i)$ , and  $\frac{1}{V_m^I} = \frac{1}{V_m} (1 + [I]/K_i')$ ,  $[I]$  referred to the concentration of MMI. The slope of curves  $\frac{K_m^I}{V_m^I} \sim [I]$  and  $\frac{1}{V_m^I} \sim [I]$  were  $\frac{K_m}{V_m K_i}$  and  $\frac{1}{V_m K_i'}$  respectively. Therefore, we could derive  $K_i$  and  $K_i'$  by the secondary plotting method.

## 2. Supplementary Figures

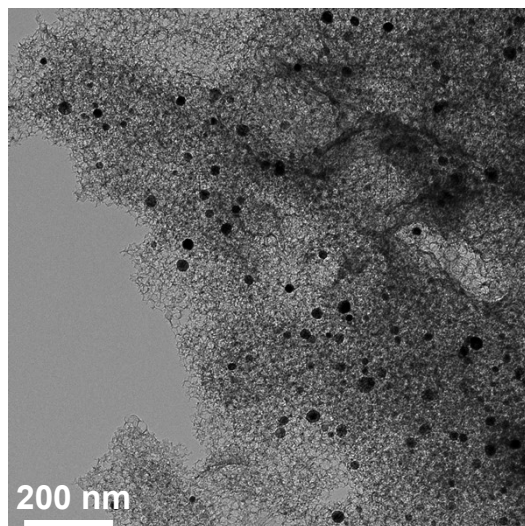

Figure S1. TEM of Pt<sub>tNP</sub>/NC.

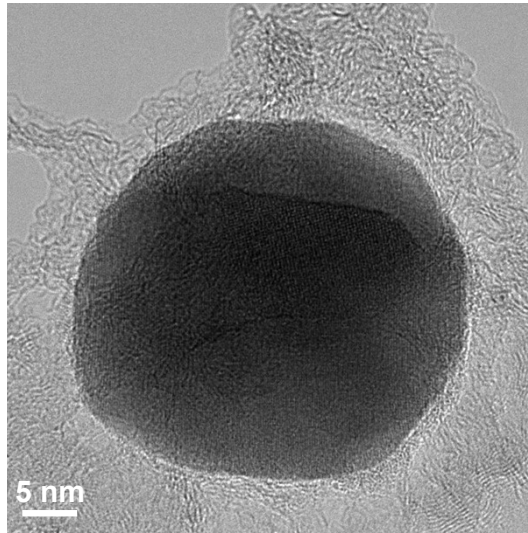

Figure S2. HRTEM images of Pt<sub>NP</sub>/NC.

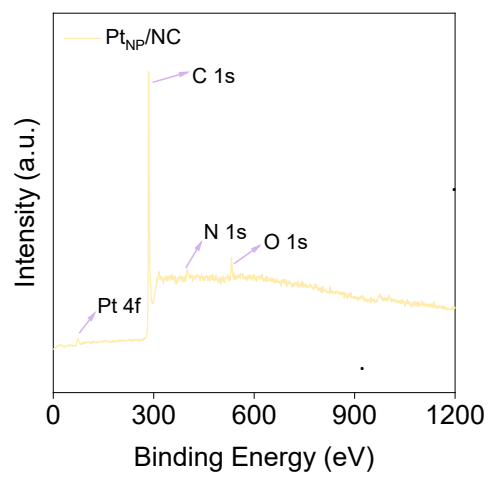

Figure S3. The survey XPS spectra of Pt<sub>NP</sub>/NC.

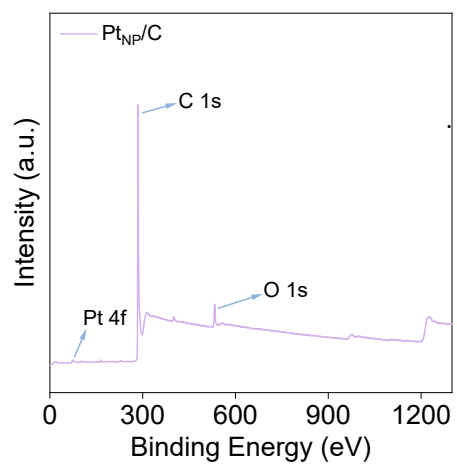

Figure S4. The survey XPS spectra of Pt<sub>NP</sub>/C.

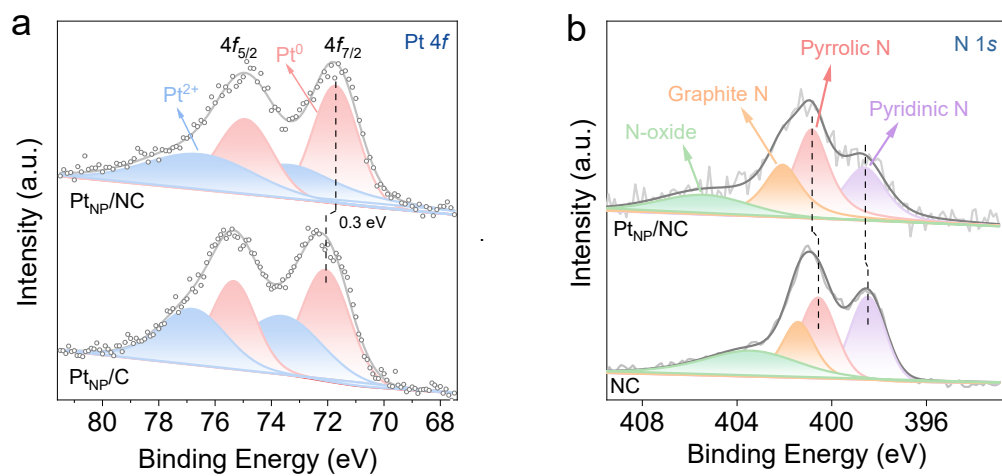

Figure S5 High-resolution XPS spectra of (a) Pt 4f, and (b) N 1s.

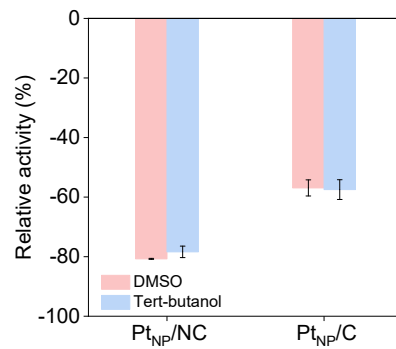

Figure S6. Absorbance inhibition degree of Pt<sub>NP</sub>/NC and Pt<sub>NP</sub>/C when DMSO and Ter-Butanol were used as intermediates quench agent.

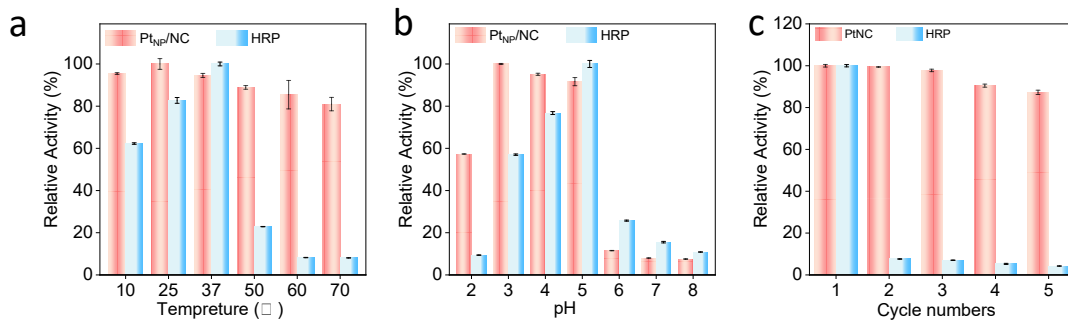

Figure S7. (a) Temperature-dependent and (b) pH activities for Pt<sub>NP</sub>/NC nanozymes. (c) Absorbance values of TMB catalyzed by Pt<sub>NP</sub>/NC and HRP for five cycles.

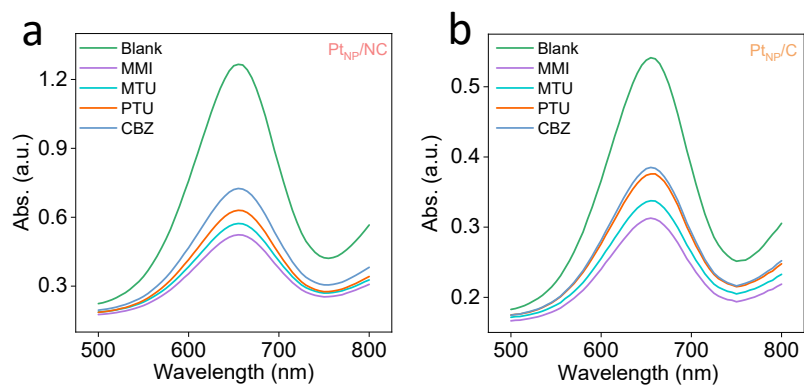

Figure S8. Absorption curves of Pt<sub>NP</sub>/NC and Pt<sub>NP</sub>/C with different antithyroid drugs (MMI, MTU, PTU and CBZ).

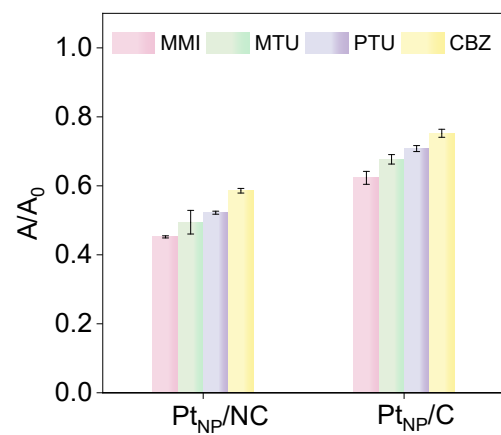

Figure S9. Colorimetric response patterns  $A/A_0$  of sensor arrays toward four kinds of antithyroid drugs, where  $A$  signifies the absorbance in the presence of antithyroid drugs, and  $A_0$  denotes the absorbance in their absence.

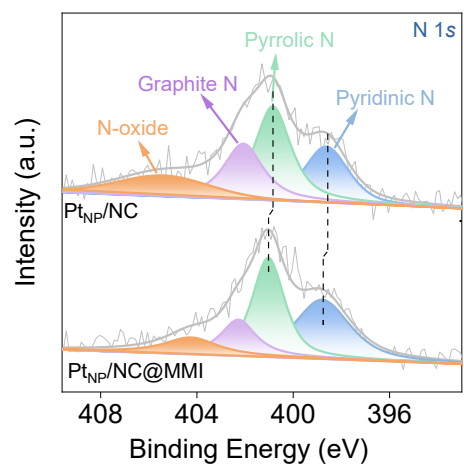

Figure S10. N 1s XPS spectra of Pt<sub>NP</sub>/NC and MMI-combined Pt<sub>NP</sub>/NC.

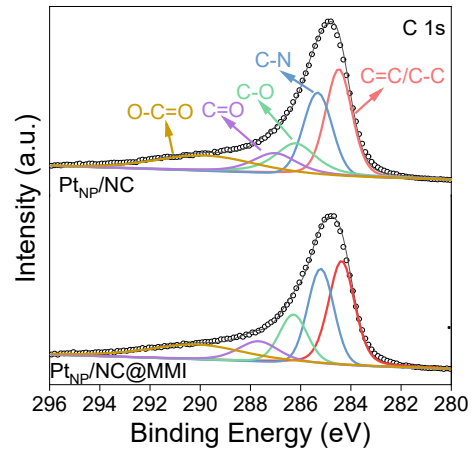

Figure S11. C 1s XPS spectra of Pt<sub>NP</sub>/NC and MMI-combined Pt<sub>NP</sub>/NC.

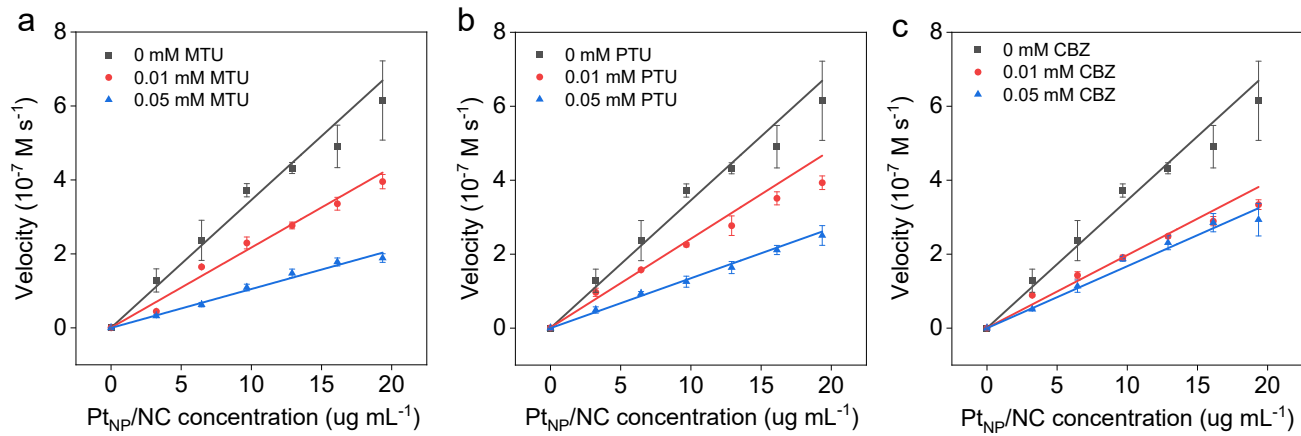

Figure S12.  $Pt_{NP}/NC$  at different MTU, PTU, and CBZ concentrations, respectively.

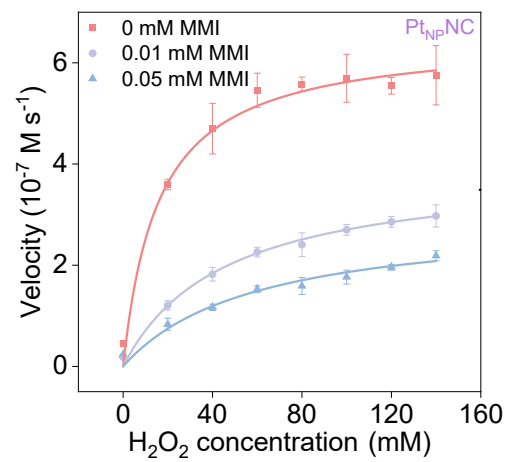

Figure S13. Michaelis–Menten curves of H<sub>2</sub>O<sub>2</sub> activation by Pt<sub>NP</sub>/NC at different MMI concentrations.

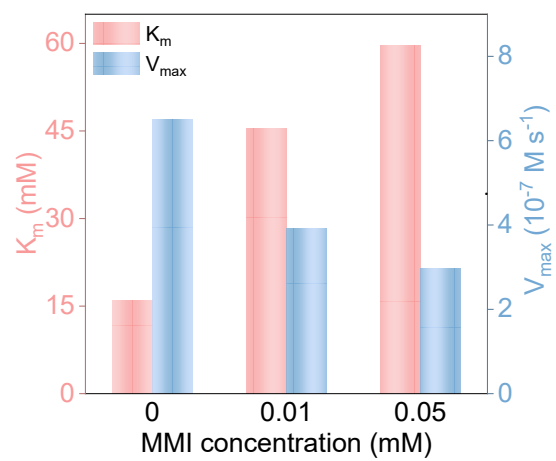

Figure S14. The  $K_m^I$  and  $V_{max}^I$  values of Pt<sub>NP</sub>/NC in the presence of varying MMI concentrations.

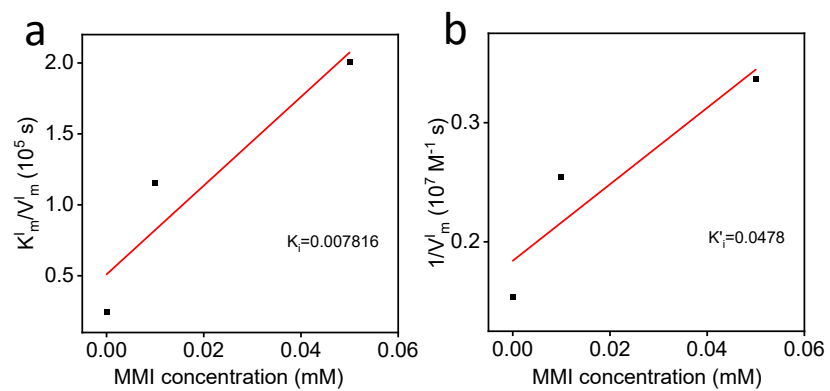

Figure S15. (a) Slopes ( $1/V_m^I$ ) and (b) intercepts ( $1/V_m^I$ ) of Lineweaver-Burk plots of Pt<sub>NP</sub>/NC for H<sub>2</sub>O<sub>2</sub> at different MMI concentrations.

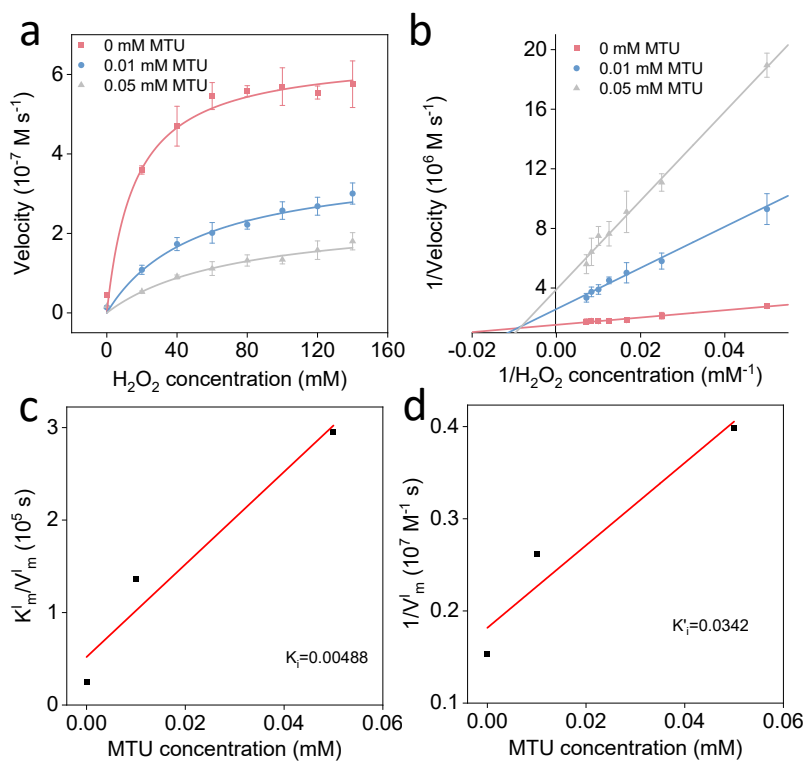

Figure S16. (a) Michaelis–Menten curves and (b) Lineweaver–Burk plots of H<sub>2</sub>O<sub>2</sub> activation by Pt<sub>NP</sub>/NC at different MTU concentrations. (c) slopes ( $1/V_m$ ), and (d) intercepts ( $1/V_m$ ) of Lineweaver–Burk plots of Pt<sub>NP</sub>/NC for H<sub>2</sub>O<sub>2</sub> at different MTU concentrations.

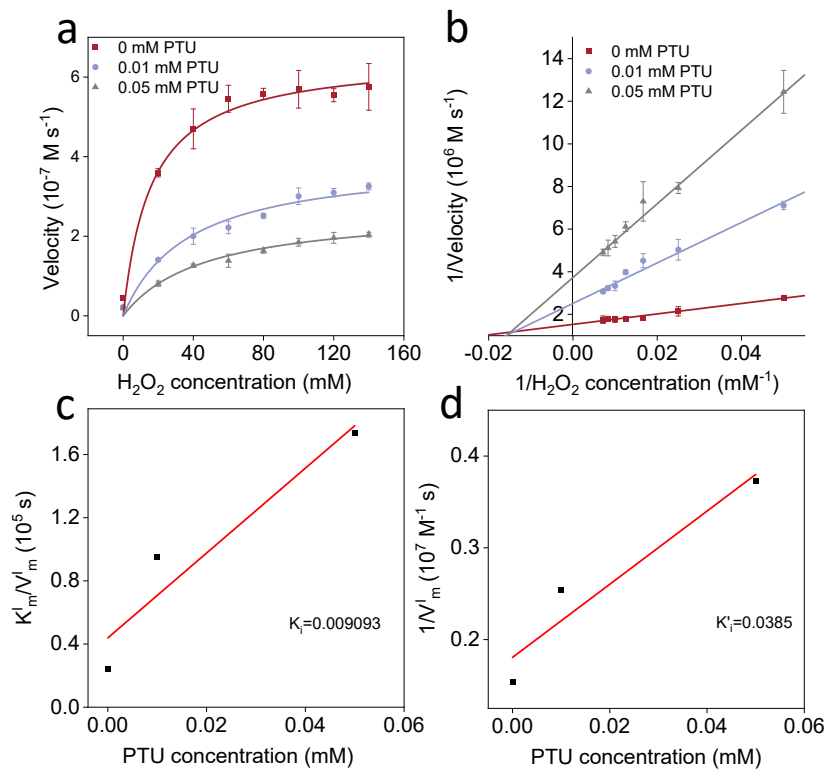

Figure S17. (a) Michaelis–Menten curves and (b) Lineweaver–Burk plots of  $\text{H}_2\text{O}_2$  activation by  $\text{Pt}_{\text{NP}}/\text{NC}$  at different PTU concentrations. (c) slopes ( $1/V_m$ ), and (d) intercepts ( $1/V_m$ ) of Lineweaver–Burk plots of  $\text{Pt}_{\text{NP}}/\text{NC}$  for  $\text{H}_2\text{O}_2$  at different PTU concentrations.

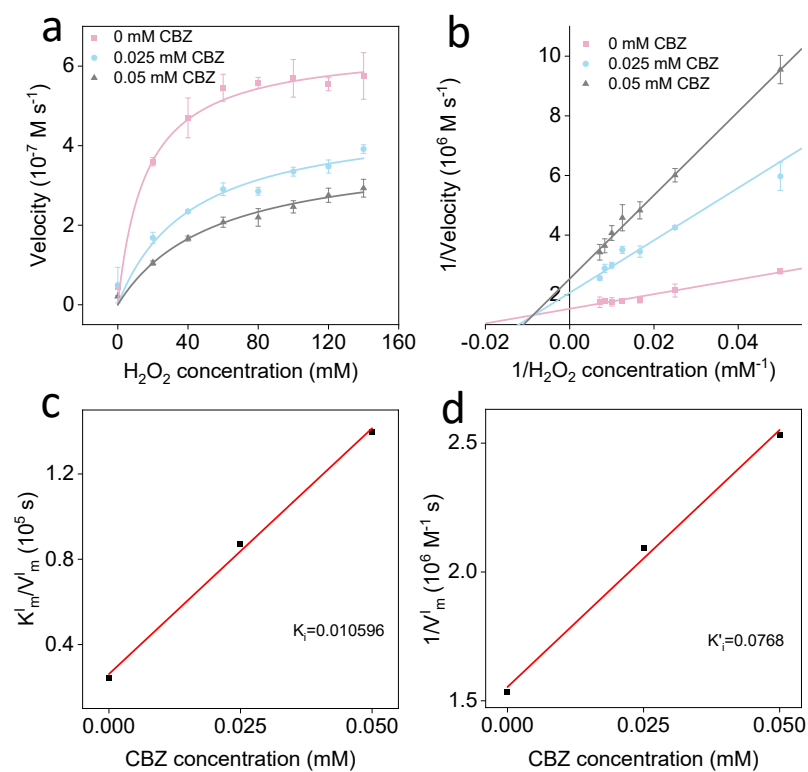

Figure S18. (a) Michaelis–Menten curves and (b) Lineweaver–Burk plots of  $\text{H}_2\text{O}_2$  activation by  $\text{Pt}_{\text{NP}}/\text{NC}$  at different CBZ concentrations. (c) slopes ( $1/V_m$ ), and (d) intercepts ( $1/V_m$ ) of Lineweaver–Burk plots of  $\text{Pt}_{\text{NP}}/\text{NC}$  for  $\text{H}_2\text{O}_2$  at different CBZ concentrations.

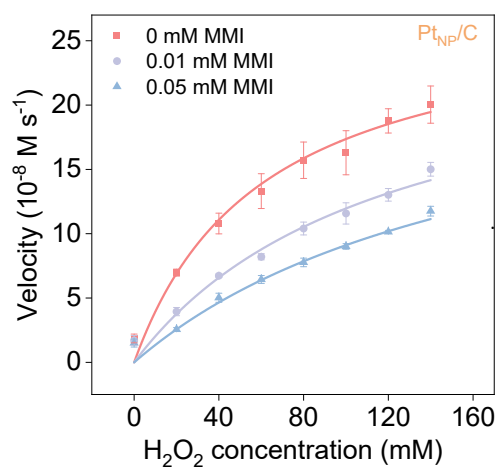

Figure S19. Michaelis–Menten curves of H<sub>2</sub>O<sub>2</sub> activation by Pt<sub>t</sub>NP/C at different MMI concentrations.

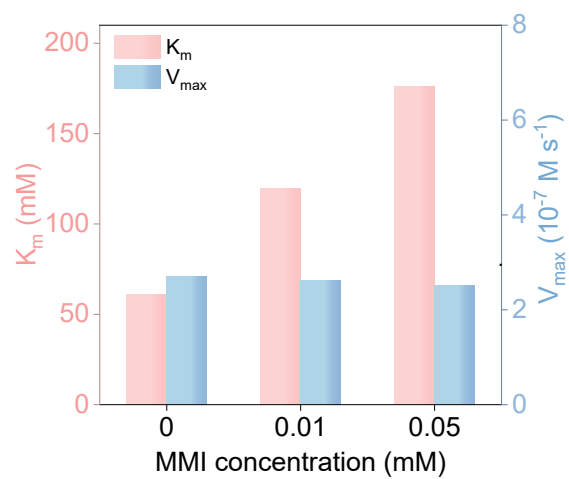

Figure S20. The  $K_m^I$  and  $V_{max}^I$  values of Pt<sub>NP</sub>/NC in the presence of varying MMI concentrations.

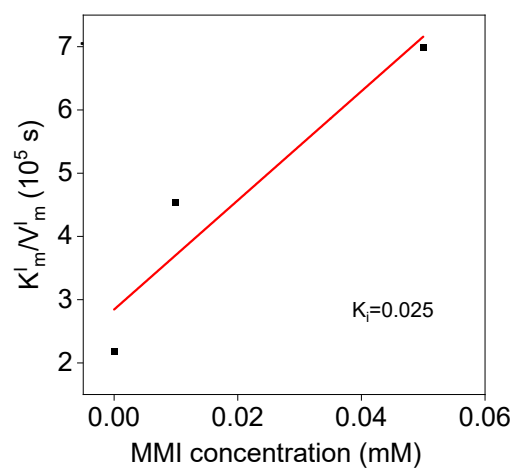

Figure S21. Slopes ( $1/V_m^l$ ) of Lineweaver-Burk plots of  $Pt_{NP}/C$  for  $H_2O_2$  at different MMI concentrations.

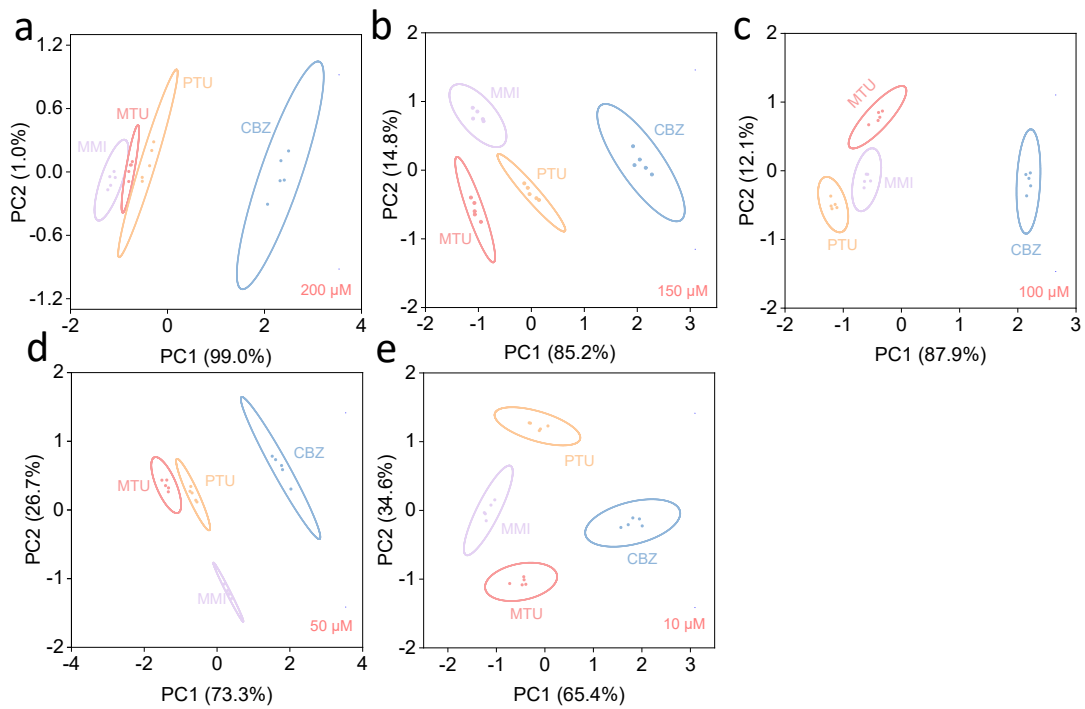

Figure S22. (a) 2D canonical score plots for the first two colorimetric response patterns  $A/A_0$  factors towards 200  $\mu\text{M}$ , (b) 150  $\mu\text{M}$ , (c) 100  $\mu\text{M}$ , (d) 50  $\mu\text{M}$ , and (e) 10  $\mu\text{M}$ .

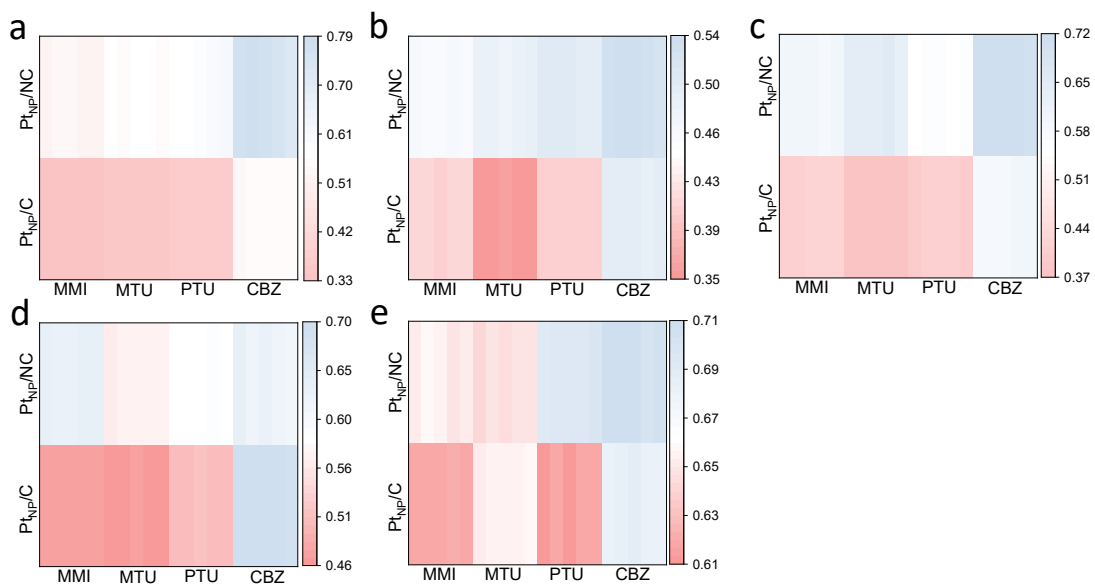

Figure S23. (a) The heat map originated from the absorbance changes  $A/A_0$  of the sensor array against four kinds of antithyroid drugs at 200  $\mu\text{M}$ , (b) 150  $\mu\text{M}$ , (c) 100  $\mu\text{M}$ , (d) 50  $\mu\text{M}$ , and (e) 10  $\mu\text{M}$ .

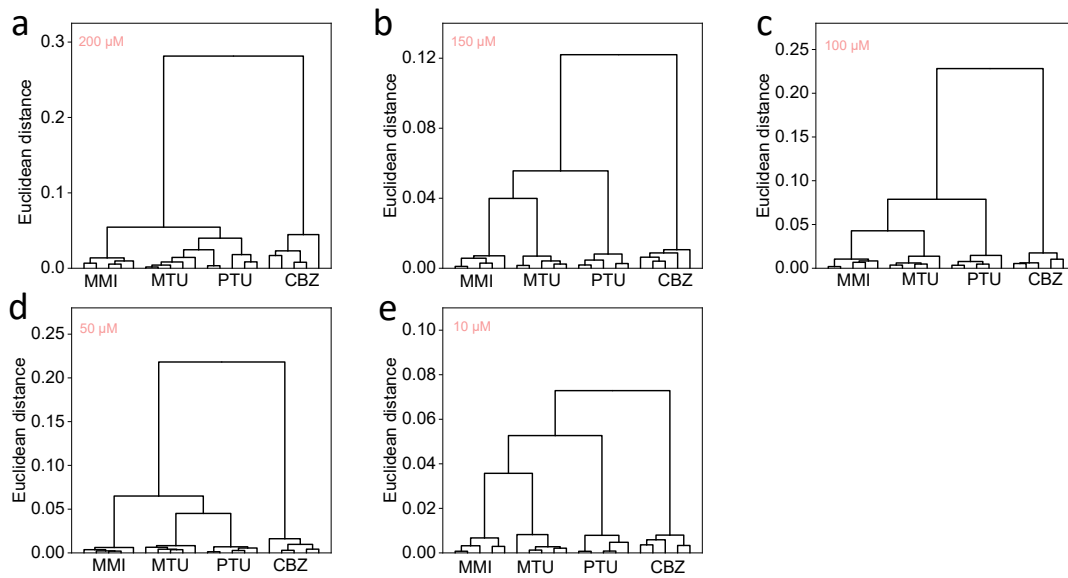

Figure S24. (a) Hierarchical cluster analysis of the absorbance changes  $A/A_0$  of the sensor array against four kinds of antithyroid drugs at 200  $\mu\text{M}$ , (b) 150  $\mu\text{M}$ , (c) 100  $\mu\text{M}$ , (d) 50  $\mu\text{M}$ , and (e) 10  $\mu\text{M}$ .

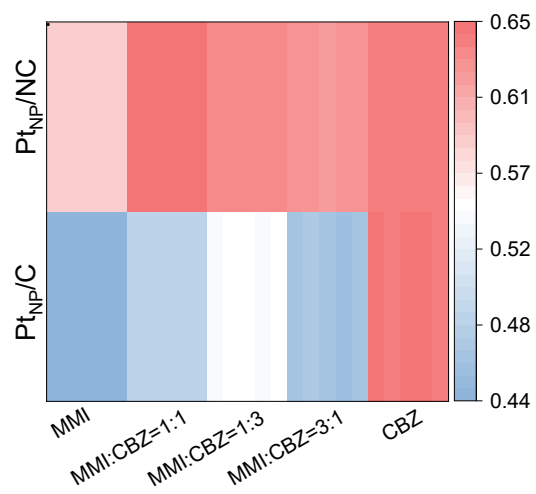

Figure S25. Heat map of the sensor array in response to a mixture of MMI and CBZ in different proportions.

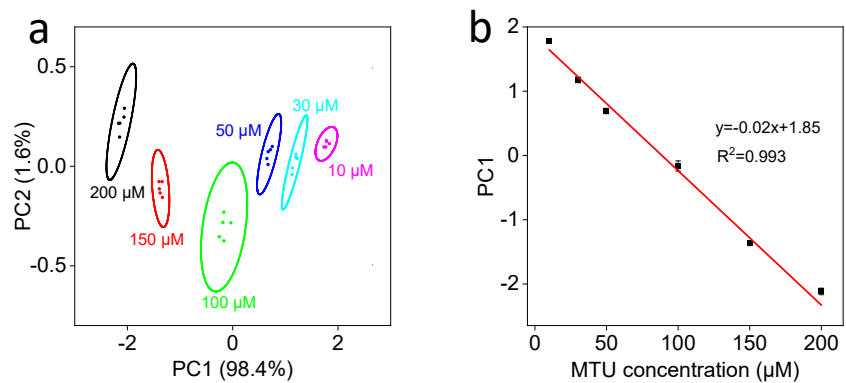

Figure S26. PCA canonical score plots and the linear calibration plots for the discrimination of different concentrations of MTU.

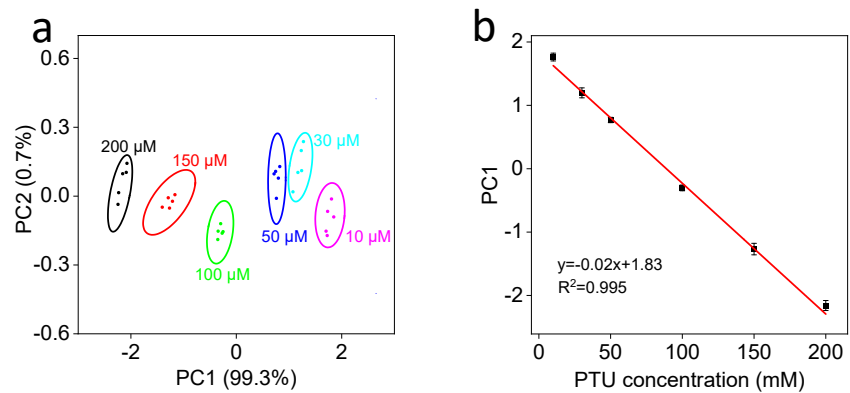

Figure S27. PCA canonical score plots and the linear calibration plots for discrimination of different concentrations of PTU.

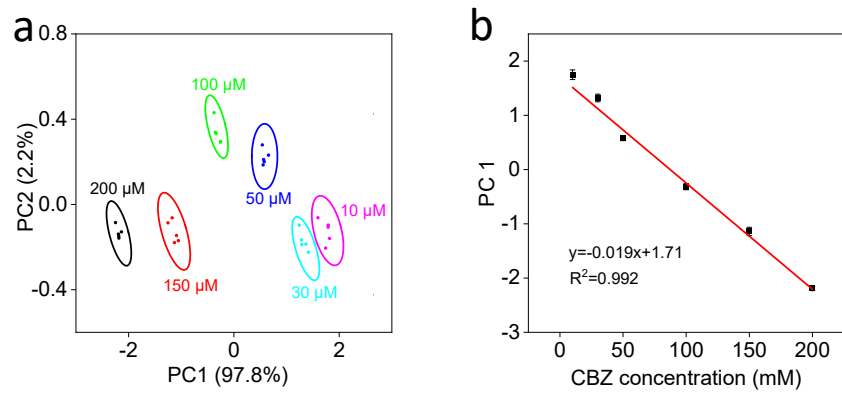

Figure S28. PCA canonical score plots and the linear calibration plots for the discrimination of different concentrations of CBZ.

### 3. Supplementary Tables

Table S1. Kinetic parameters of nanozymes with POD-like activity at different H<sub>2</sub>O<sub>2</sub> concentrations.

| Nanozyme             | Substrate                     | $K_m$ (mM)       | $V_{max}$ ( $\times 10^{-7}$ M s <sup>-1</sup> ) |
|----------------------|-------------------------------|------------------|--------------------------------------------------|
| NC                   | H <sub>2</sub> O <sub>2</sub> | 36.60 $\pm$ 6.87 | 2.21 $\pm$ 0.181                                 |
| Pt <sub>NP</sub> /C  | H <sub>2</sub> O <sub>2</sub> | 58.79 $\pm$ 1.58 | 3.95 $\pm$ 0.607                                 |
| Pt <sub>NP</sub> /NC | H <sub>2</sub> O <sub>2</sub> | 16.95 $\pm$ 1.15 | 5.28 $\pm$ 0.744                                 |
